# Supplementary material for: Identification of prognostic biomarkers and drug target prediction for colon cancer according to a competitive endogenous RNA network
Source: PubMed Central journal article supplement — Mol Med Rep. 2020 May 22;22(2):620–32. doi: 10.3892/mmr.2020.11171 (PMC7339803; doi:10.3892/mmr.2020.11171), 2020-05-22
Supplement: Supplementary_Data.pdf [file Supplementary_Data.pdf]

Figure S1. lncRNA-miRNA-mRNA competitive Network Cluster1 in Colon Cancer. lncRNA, long non-coding RNA; miRNA, microRNA.

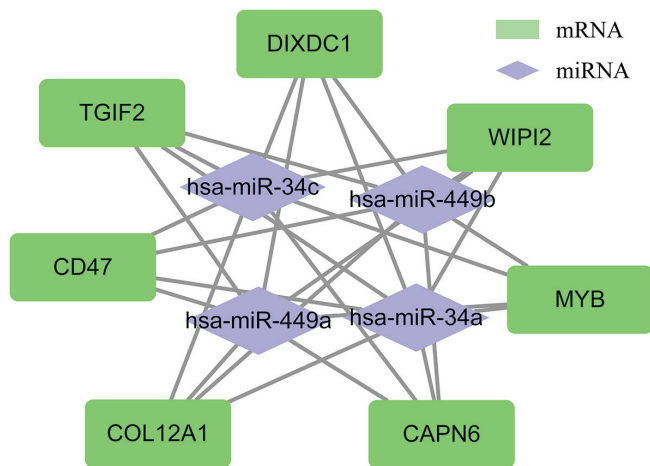

Figure S2. lncRNA-miRNA-mRNA competitive Network Cluster2 in Colon Cancer. lncRNA, long non-coding RNA; miRNA, microRNA.

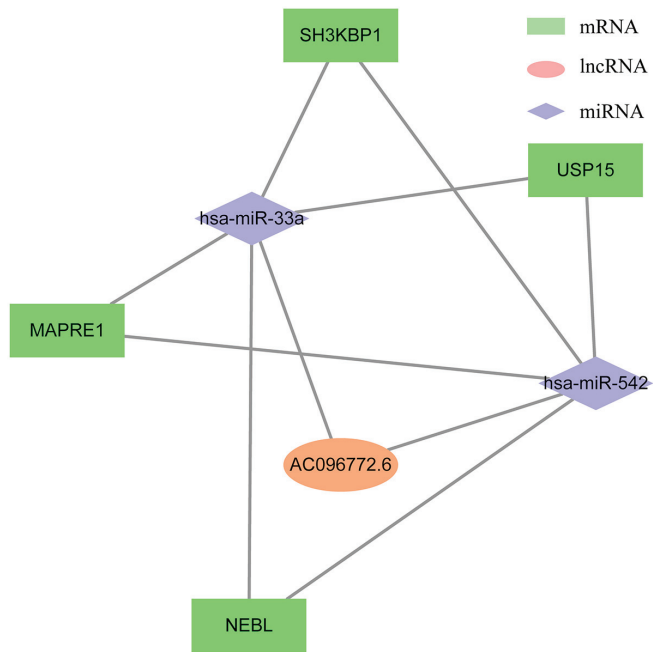

Figure S3. lncRNA-miRNA-mRNA competitive Network Cluster 3 in Colon Cancer. lncRNA, long non-coding RNA; miRNA, microRNA.

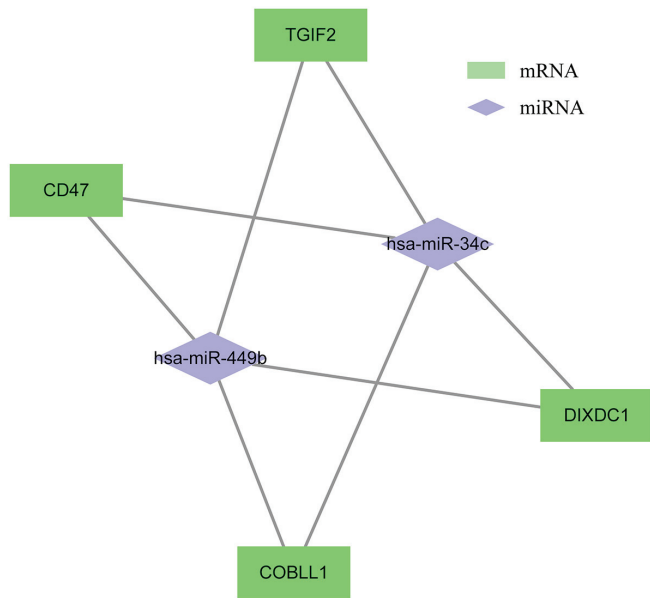

Figure S4. lncRNA-miRNA-mRNA competitive Network Cluster 4 in Colon Cancer. lncRNA, long non-coding RNA; miRNA, microRNA.

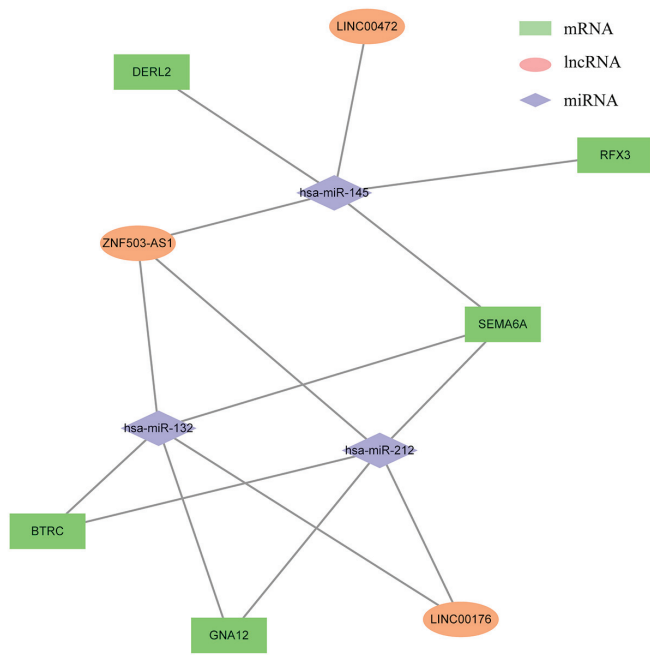

Table S1. Hub lncRNAs, miRNAs and mRNAs in the ceRNA network in colon cancer.

| RNA category (N) |              | Gene names   |              |              |              |              |              |              |              |        |  |  |  |  |
|------------------|--------------|--------------|--------------|--------------|--------------|--------------|--------------|--------------|--------------|--------|--|--|--|--|
| Hub lncRNAs (17) | MALAT1       | LINC00662    | HCG11        | ERVH48-1     | LINC00475    | NEAT1        | PWRN1        | PVT1         | LINC00657    |        |  |  |  |  |
|                  | TTYTY10      | LINC00472    | LINC00839    | MEG3         | LINC00176    | BCYRN1       | EPB41L4A-AS1 | TTYTY15      |              |        |  |  |  |  |
| Hub miRNAs (87)  | hsa-miR-16   | hsa-miR-195  | hsa-miR-424  | hsa-miR-497  | hsa-miR-17   | hsa-miR-93   | hsa-miR-20b  | hsa-miR-519d | hsa-miR-15b  |        |  |  |  |  |
|                  | hsa-miR-15a  | hsa-miR-20a  | hsa-miR-106b | hsa-miR-106a | hsa-miR-590  | hsa-miR-302c | hsa-miR-302d | hsa-miR-302b | hsa-miR-181d |        |  |  |  |  |
|                  | hsa-miR-181a | hsa-miR-181b | hsa-miR-181c | hsa-miR-520d | hsa-miR-520c | hsa-miR-32   | hsa-miR-454  | hsa-miR-454  | hsa-miR-506  |        |  |  |  |  |
|                  | hsa-miR-30d  | hsa-miR-30e  | hsa-miR-30b  | hsa-miR-30c  | hsa-miR-367  | hsa-miR-363  | hsa-miR-144  | hsa-miR-144  | hsa-miR-301b |        |  |  |  |  |
|                  | hsa-miR-92b  | hsa-miR-25   | hsa-miR-130a | hsa-miR-130b | hsa-miR-301a | hsa-miR-124  | hsa-miR-186  | hsa-miR-186  | hsa-miR-107  |        |  |  |  |  |
|                  | hsa-let-7a   | hsa-let-7f   | hsa-miR-98   | hsa-let-7b   | hsa-let-7c   | hsa-let-7g   | hsa-let-7i   | hsa-let-7i   | hsa-let-7e   |        |  |  |  |  |
|                  | hsa-miR-96   | hsa-miR-320d | hsa-miR-320b | hsa-miR-320a | hsa-miR-320c | hsa-miR-1271 | hsa-miR-373  | hsa-miR-373  | hsa-miR-302a |        |  |  |  |  |
|                  | hsa-miR-495  | hsa-miR-503  | hsa-miR-340  | hsa-miR-204  | hsa-miR-211  | hsa-miR-23b  | hsa-miR-129  | hsa-miR-129  | hsa-miR-214  |        |  |  |  |  |
|                  | hsa-miR-143  | hsa-miR-182  | hsa-miR-449b | hsa-miR-34c  | hsa-miR-539  | hsa-miR-153  | hsa-miR-449a | hsa-miR-449a | hsa-miR-214  |        |  |  |  |  |
|                  | hsa-miR-494  | hsa-miR-135a | hsa-miR-138  | hsa-miR-202  | hsa-miR-7    | hsa-miR-27a  |              |              | hsa-miR-34a  |        |  |  |  |  |
|                  | SLC30A7      | SHOC2        | SKI          | NFAT5        | FNDC3A       | SAMD12       | ZBTB9        | ZBTB9        | SLC39A6      | MEDI2L |  |  |  |  |
|                  | EZH1         | PRRG1        | TGIF2        | FCHO2        | ABL2         | CD47         | STARD4       | STARD4       | DMTF1        | RBL2   |  |  |  |  |
|                  | ZBTB33       | SMAD5        | DIXDC1       | CSDE1        | PDP1         | PTH          | RAPGEF4      | RAPGEF4      | TMEM135      | COBLL1 |  |  |  |  |
|                  | MYB          | FURIN        | PGM2L1       | PBX3         | ZRANB1       | ZKSCAN1      | CDS2         | CDS2         | RAB11FIP2    | UBE2Q1 |  |  |  |  |
|                  | AKAP11       | TCF7L1       | PCMTD1       | PKN2         | TGFBR2       | ANKIB1       | BMP1         | BMP1         | BTBD10       | CBFB   |  |  |  |  |
|                  | CNOT7        | COL19A1      | CREB5        | CYP2U1       | DPYSL2       | FBXO28       | HBP1         | HBP1         | IKZF4        | ITGB8  |  |  |  |  |
| KBTBD8           | MASTL        | MAT2B        | MYT1L        | NBEA         | NFIB         | NPAT         | NPAT         | PAFAH1B1     | PEX5L        |        |  |  |  |  |
| PFKFB3           | PLCB1        | PLSCR4       | RAB30        | RASD1        | RUNX3        | SCN3A        | SCN3A        | SMAD4        | TRIM37       |        |  |  |  |  |
| UBE2W            | USP28        | YTHDC1       | CHD6         | DNAJB4       | GCC2         | CAPN6        | CAPN6        | UBE4A        | WIF1         |        |  |  |  |  |
| WIPI2            | FAM120C      | ZNF689       | ANKRD29      | CXCL14       | TMUB2        | TRIP11       | TRIP11       | ZNFX1        | ARHGAP12     |        |  |  |  |  |
| ABCA1            | HECTD2       | INTS6        | KLF3         | LMO3         | MAP3K2       | OXR1         | OXR1         | PURB         | ROCK2        |        |  |  |  |  |
| SLC25A36         | ZBTB41       | ZNF148       | PAFAH1B2     | HAS2         | PDGFRB       | SALL4        | SALL4        | HECTD1       | ATXN1        |        |  |  |  |  |
| FKBP1A           | TBC1D19      | RBBP6        | ZDHHC15      | COL12A1      | CUL3         | ZSWIM6       | ZSWIM6       | MYO10        | SH3BP5       |        |  |  |  |  |
| ARID4B           | DPY19L3      | E2F5         | FBXO11       | FYCO1        | HLF          | MCC          | MCC          | NR2C2        | PFN2         |        |  |  |  |  |
| RBL1             | RBM12B       | RGLI         | RNF6         | RRAGD        | SSI8L1       | TNKS2        | TNKS2        | USP24        | TET1         |        |  |  |  |  |
| ITGA10           | SLC15A4      | NAVI         | ZNF117       | LMAN2L       | PIMI         | TGOLN2       | TGOLN2       | NFIA         | USP25        |        |  |  |  |  |
